# Supplementary material for: Metabolic-network-driven analysis of bacterial ecological strategies
Source: PubMed Central journal article supplement (PMC2718495; doi:10.1186/gb-2009-10-6-r61), 2009-06-05
Supplement: gb-2009-10-6-r61-S5.pdf [file gb-2009-10-6-r61-S5.pdf]

| <b>KEGG #</b> | <b>Description</b>           |
|---------------|------------------------------|
| C00002        | ATP                          |
| C00003        | NAD+                         |
| C00004        | NADH                         |
| C00005        | NADPH                        |
| C00006        | NADP+                        |
| C00008        | ADP                          |
| C00015        | UDP                          |
| C00016        | FAD                          |
| C00020        | AMP                          |
| C00024        | Acetyl-CoA                   |
| C00025        | L-Glutamate                  |
| C00035        | GDP                          |
| C00037        | Glycine                      |
| C00041        | L-Alanine                    |
| C00043        | UDP-N-acetyl-D-glucosamine   |
| C00044        | GTP                          |
| C00047        | L-Lysine                     |
| C00049        | L-Aspartate                  |
| C00054        | Adenosine 3',5'-bisphosphate |
| C00055        | CMP                          |
| C00062        | L-Arginine                   |
| C00063        | CTP                          |
| C00064        | L-Glutamine                  |
| C00065        | L-Serine                     |
| C00073        | L-Methionine                 |
| C00075        | UTP                          |
| C00078        | L-Tryptophan                 |
| C00079        | L-Phenylalanine              |
| C00082        | L-Tyrosine                   |
| C00097        | L-Cysteine                   |
| C00105        | UMP                          |
| C00112        | CDP                          |
| C00116        | Glycerol                     |
| C00123        | L-Leucine                    |
| C00131        | dATP                         |
| C00135        | L-Histidine                  |
| C00144        | GMP                          |
| C00148        | L-Proline                    |
| C00152        | L-Asparagine                 |
| C00183        | L-Valine                     |
| C00188        | L-Threonine                  |
| C00234        | 10-Formyltetrahydrofolate    |
| C00239        | dCMP                         |
| C00249        | Hexadecanoic acid            |
| C00255        | Riboflavin                   |
| C00286        | dGTP                         |
| C00350        | Phosphatidylethanolamine     |
| C00360        | dAMP                         |
| C00362        | dGMP                         |
| C00364        | dTMP                         |
| C00399        | Ubiquinone                   |

|        |                                                                  |
|--------|------------------------------------------------------------------|
| C00407 | L-Isoleucine                                                     |
| C00458 | dCTP                                                             |
| C00459 | dTTP                                                             |
| C00641 | 1,2-Diacyl-sn-glycerol                                           |
| C00748 | Siroheme                                                         |
| C01050 | UDP-N-acetylmuramate                                             |
| C05764 | Hexadecanoyl-[acp]                                               |
| C05890 | Undecaprenyl-diphospho-N-acetylmuramoyl-(N-acetylglucosamine)-L- |
| C05894 | Undecaprenyl-diphospho-N-acetylmuramoyl-(N-acetylglucosamine)-L- |
| C05899 | Undecaprenyl-diphospho-N-acetylmuramoyl-(N-acetylglucosamine)-L- |
| C05980 | Cardiolipin                                                      |
| C06040 | Diglucosyl-diacylglycerol                                        |
| C15672 | Heme O                                                           |
| C16221 | (2E)-Octadecenoyl-[acp]                                          |
